# Supplementary material
Source: MDPI journal article supplement (https://www.mdpi.com/2624-862X/2/1/12)
Supplement: s1 [file s1]

## Supplementary Material

### Description of the Parametric Programming Matrix

| VARIABLES         | Purchasing | Producing | Multi-purpose | HLabPu | HLabPr | HLabVs | PMilkPr | PMilkPr | PMilkVs |
|-------------------|------------|-----------|---------------|--------|--------|--------|---------|---------|---------|
| max               | PuGM       | PrGM      | VsGM          | -LW    | -LW    | -LW    | PPu     | PPr     | PVs     |
| LandIrrPr>=       | 0          | LIrrPr    |               |        |        |        |         |         |         |
| LandNIrrPr>=      | 0          | LNIrrPr   |               |        |        |        |         |         |         |
| LandIrrVs>=       | 0          |           | LIrrVs        |        |        |        |         |         |         |
| LandNIrrVs>=      | 0          |           | LNIrrVs       |        |        |        |         |         |         |
| FamLab >=         | FLPu       | FLPr      | FLVs          |        |        |        |         |         |         |
| 0 >=              | HLPu       |           |               | -1     |        |        |         |         |         |
| 0 >=              |            | HLPPr     |               |        | -1     |        |         |         |         |
| 0 >=              |            |           | HLVs          |        |        | -1     |         |         |         |
| MilkProdPu<br>0>= | -MilkPu    |           |               |        |        |        | 1       |         |         |
| MilkProdPr<br>0>= |            | -MilkPr   |               |        |        |        |         | 1       |         |
| MilkProdVs<br>0>= |            |           | -MilkVs       |        |        |        |         |         | 1       |
| VCTot>=           | VCPu       | VCPPr     | VCVs          |        |        |        |         |         |         |

#### Objective function

**Purchasing (Pu); Producing (Pr); Multi-purpose (Ms) = Farm types**

**PuGM, PrGM, MsGM:** Gross margin per farm type calculated as GM = Revenues other than milk (minus) Variable expenses

**LW**—Hired labor wage

**PPu, PPr, PMs**—Price of milk per farm type (allowed to vary for the PPP model)

#### Constraints

##### Land

**LandIrr/LandNIrr:** Available irrigated and non-irrigated land in ha (for “Producing” (Pr) and “Multi-purpose” (Ms) farms)

**LIrrPr, LNIrr:** Required land per farm (for “Producing” (Pr) and “Multi-purpose” (Ms) farms)

##### Labor

**FamLab** available family labor

**FLPu, FLPr, FLMs** family labor requirements per farm (for “Purchasing” (Pu), “Producing” (Pr) and “Multi-purpose” (Ms) farms)

**HLPu, HLPPr, HLMs** hired labor requirements per farm (for “Purchasing” (Pu), “Producing” (Pr) and “Multi-purpose” (Ms) farms)

**MilkPu, MilkPr, MilkMs** Milk production per farm (for “Purchasing” (Pu), “Producing” (Pr) and “Multi-purpose” (Ms) farms)

##### Capital—Varying constraint (in RHS-PP)

**VCTot**—Available variable capital

**VCPu, VCPPr, VCVs** variable capital requirements per farm (for “Purchasing” (Pu), “Producing” (Pr) and “Multi-purpose” (Ms) farms)
